# Supplementary material
Source: MDPI journal article supplement (https://www.mdpi.com/1424-2818/13/11/524)
Supplement: s1 [file s1 › diversity-1348214-supplementary.pdf]

## Supplementary Materials

**Table S1.** Number of fixed-point locations at solar facilities and reference areas by study site.

| Site Name                          | Blythe |      | CSV  |      | Seville |      | Highlander |      | Mt. Signal |      | Ref. A | Lake Tamarisk | Total Year |
|------------------------------------|--------|------|------|------|---------|------|------------|------|------------|------|--------|---------------|------------|
| Site Type <sup>1</sup>             | Fac.   | Ref. | Fac. | Ref. | Fac.    | Ref. | Fac.       | Ref. | Fac.       | Ref. | Ref.   | Ref.          |            |
| <u>10-min Fixed Point</u>          |        |      |      |      |         |      |            |      |            |      |        |               |            |
| 2018                               | 18     | 18   | 18   | 18   | 18      | 18   |            |      |            |      | 22     | 3             | 133        |
| 2019                               |        |      |      |      | 18      | 18   | 7          | 18   | 18         | 18   |        |               | 97         |
| <u>60-min Long-Sit Point Count</u> |        |      |      |      |         |      |            |      |            |      |        |               |            |
| 2019                               |        |      |      |      | 1       | 1    | 1          | 1    | 1          | 1    |        |               | 6          |
| Total Project                      | 18     | 18   | 18   | 18   | 19      | 19   | 8          | 19   | 19         | 19   | 22     | 3             | 200        |
| Habitat Category <sup>2</sup>      | DS     |      | GR   |      | DS      |      | DS         |      | AG         |      | DS     | WA            |            |

<sup>1</sup> Fac. = Solar Facility; Ref. = Reference Area.

<sup>2</sup> DS = Desert/Scrub; GR = Grassland; AG = Agriculture; WA = Water

CSV = California Valley Solar Ranch, NLCD = National Land Cover Database, Reference A = desert habitat outside of Desert Sunlight

**Table S2.** Viewshed (meters) used for fatality monitoring with the solar field and in reference areas, and total survey area (ha) at 5 study sites over 2 years.

| Facility                      | Location                   | Nameplate Capacity (Megawatts)* | Study Year | Area Searched Facility (ha) | Area Searched Reference (ha) | Habitat Category | Technology |
|-------------------------------|----------------------------|---------------------------------|------------|-----------------------------|------------------------------|------------------|------------|
| California Valley Solar Ranch | San Luis Obispo County, CA | 250                             | 2018       | 99                          | 40                           | Grassland        | Tracker    |
| Blythe                        | Riverside County, CA       | 235                             | 2018       | 87                          | 160                          | Desert/Scrub     | Tracker    |
| Seville                       | Imperial County, CA        | 50                              | 2018, 2019 | 136                         | 120 (year 1)<br>135 (year 2) | Desert/Scrub     | Tracker    |
| Desert Sunlight – Reference A | Riverside County, CA       | 550                             | 2018       | -                           | 161                          | Desert/Scrub     | Fixed      |
| Highlander II                 | San Bernardino County, CA  | 21                              | 2019       | 26                          | 256                          | Desert/Scrub     | Tracker    |
| Mt. Signal 3                  | Imperial County, CA        | 328                             | 2019       | 62                          | 166                          | Agriculture      | Tracker    |

\*The number of watts the generator can provide at full rated power.

**Table S3.** Number of searcher efficiency trials deployed by study site, strata type, bird size category, and year.

| Site                          | Type      | Size       | Year | Trials |
|-------------------------------|-----------|------------|------|--------|
| Blythe                        | Reference | Large Bird | 2018 | 10     |
| Blythe                        | Reference | Small Bird | 2018 | 16     |
| California Valley Solar Ranch | Facility  | Large Bird | 2018 | 20     |
| California Valley Solar Ranch | Reference | Large Bird | 2018 | 20     |
| California Valley Solar Ranch | Facility  | Small Bird | 2018 | 23     |
| California Valley Solar Ranch | Reference | Small Bird | 2018 | 24     |
| Seville                       | Facility  | Large Bird | 2018 | 20     |
| Seville                       | Reference | Large Bird | 2018 | 20     |
| Seville                       | Facility  | Small Bird | 2018 | 24     |
| Seville                       | Reference | Small Bird | 2018 | 24     |
| Highlander II                 | Facility  | Large Bird | 2019 | 19     |
| Highlander II                 | Reference | Large Bird | 2019 | 19     |
| Highlander                    | Facility  | Small Bird | 2019 | 16     |
| Highlander                    | Reference | Small Bird | 2019 | 20     |
| Seville                       | Facility  | Large Bird | 2019 | 20     |
| Seville                       | Reference | Large Bird | 2019 | 20     |
| Seville                       | Facility  | Small Bird | 2019 | 15     |
| Seville                       | Reference | Small Bird | 2019 | 15     |

**Table S4.** Candidate searcher efficiency models, AICc,  $\Delta$ AIC, and selected models for estimating searcher efficiency for small birds and large birds and fatality transects in the facility and reference areas, by year. Separate models were fit by size class and facility/reference areas. Site was included as a potential covariate. A model covariate of '1' indicates an intercept-only model. The best-fit selected model for each strata is indicated in bold.

| Model Covariate | Detection Function | AICc         | $\Delta$ AIC | Size Class        | Location         | Year        |
|-----------------|--------------------|--------------|--------------|-------------------|------------------|-------------|
| <b>Site</b>     | <b>Half-normal</b> | <b>44.25</b> | <b>0.00</b>  | <b>Small Bird</b> | <b>Facility</b>  | <b>2018</b> |
| Site            | Exponential        | 47.02        | 2.76         | Small Bird        | Facility         | 2018        |
| Site            | Hazard             | 51.95        | 7.69         | Small Bird        | Facility         | 2018        |
| 1               | Hazard             | 63.10        | 18.85        | Small Bird        | Facility         | 2018        |
| Site            | Uniform            | 64.74        | 20.49        | Small Bird        | Facility         | 2018        |
| 1               | Uniform            | 66.20        | 21.94        | Small Bird        | Facility         | 2018        |
| 1               | Exponential        | 66.67        | 22.41        | Small Bird        | Facility         | 2018        |
| 1               | Half-normal        | 88.03        | 43.77        | Small Bird        | Facility         | 2018        |
| <b>Site</b>     | <b>Half-normal</b> | <b>20.56</b> | <b>0.00</b>  | <b>Large Bird</b> | <b>Facility</b>  | <b>2018</b> |
| Site            | Exponential        | 22.10        | 1.54         | Large Bird        | Facility         | 2018        |
| Site            | Uniform            | 26.82        | 6.26         | Large Bird        | Facility         | 2018        |
| Site            | Hazard             | 31.65        | 11.09        | Large Bird        | Facility         | 2018        |
| 1               | Uniform            | 32.25        | 11.69        | Large Bird        | Facility         | 2018        |
| 1               | Hazard             | 34.52        | 13.97        | Large Bird        | Facility         | 2018        |
| 1               | Exponential        | 35.35        | 14.79        | Large Bird        | Facility         | 2018        |
| 1               | Half-normal        | 44.57        | 24.01        | Large Bird        | Facility         | 2018        |
| <b>1</b>        | <b>Hazard</b>      | <b>82.29</b> | <b>0.00</b>  | <b>Small Bird</b> | <b>Reference</b> | <b>2018</b> |
| 1               | Exponential        | 84.34        | 2.04         | Small Bird        | Reference        | 2018        |
| 1               | Uniform            | 85.66        | 3.36         | Small Bird        | Reference        | 2018        |
| Site            | Exponential        | 86.28        | 3.98         | Small Bird        | Reference        | 2018        |
| Site            | Uniform            | 86.70        | 4.41         | Small Bird        | Reference        | 2018        |
| Site            | Hazard             | 89.07        | 6.77         | Small Bird        | Reference        | 2018        |
| Site            | Half-normal        | 107.94       | 25.65        | Small Bird        | Reference        | 2018        |
| 1               | Half-normal        | 111.07       | 28.78        | Small Bird        | Reference        | 2018        |
| <b>1</b>        | <b>Half-normal</b> | <b>31.17</b> | <b>0.00</b>  | <b>Large Bird</b> | <b>Reference</b> | <b>2018</b> |
| Site            | Half-normal        | 34.73        | 3.56         | Large Bird        | Reference        | 2018        |
| 1               | Exponential        | 35.91        | 4.73         | Large Bird        | Reference        | 2018        |
| Site            | Exponential        | 38.56        | 7.38         | Large Bird        | Reference        | 2018        |
| 1               | Uniform            | 46.05        | 14.88        | Large Bird        | Reference        | 2018        |
| Site            | Uniform            | 46.70        | 15.52        | Large Bird        | Reference        | 2018        |
| 1               | Hazard             | 48.45        | 17.27        | Large Bird        | Reference        | 2018        |
| Site            | Hazard             | 55.53        | 24.36        | Large Bird        | Reference        | 2018        |
| <b>Site</b>     | <b>Uniform</b>     | <b>71.80</b> | <b>0.00</b>  | <b>Small Bird</b> | <b>Facility</b>  | <b>2019</b> |
| 1               | Uniform            | 75.22        | 3.42         | Small Bird        | Facility         | 2019        |

|             |                    |              |             |                   |                  |             |
|-------------|--------------------|--------------|-------------|-------------------|------------------|-------------|
| Site        | Hazard             | 77.22        | 5.42        | Small Bird        | Facility         | 2019        |
| 1           | Hazard             | 77.29        | 5.49        | Small Bird        | Facility         | 2019        |
| Site        | Exponential        | 77.78        | 5.98        | Small Bird        | Facility         | 2019        |
| 1           | Exponential        | 82.24        | 10.44       | Small Bird        | Facility         | 2019        |
| Site        | Half-normal        | 95.07        | 23.27       | Small Bird        | Facility         | 2019        |
| 1           | Half-normal        | 101.50       | 29.70       | Small Bird        | Facility         | 2019        |
| <b>1</b>    | <b>Half-normal</b> | <b>22.15</b> | <b>0.00</b> | <b>Large Bird</b> | <b>Facility</b>  | <b>2019</b> |
| 1           | Exponential        | 22.92        | 0.77        | Large Bird        | Facility         | 2019        |
| Site        | Half-normal        | 24.20        | 2.06        | Large Bird        | Facility         | 2019        |
| Site        | Exponential        | 25.05        | 2.90        | Large Bird        | Facility         | 2019        |
| 1           | Uniform            | 25.79        | 3.64        | Large Bird        | Facility         | 2019        |
| Site        | Uniform            | 27.93        | 5.78        | Large Bird        | Facility         | 2019        |
| 1           | Hazard             | 28.33        | 6.18        | Large Bird        | Facility         | 2019        |
| Site        | Hazard             | 33.97        | 11.82       | Large Bird        | Facility         | 2019        |
| <b>Site</b> | <b>Exponential</b> | <b>63.44</b> | <b>0.00</b> | <b>Small Bird</b> | <b>Reference</b> | <b>2019</b> |
| 1           | Exponential        | 68.56        | 5.13        | Small Bird        | Reference        | 2019        |
| Site        | Hazard             | 69.35        | 5.92        | Small Bird        | Reference        | 2019        |
| 1           | Hazard             | 69.77        | 6.34        | Small Bird        | Reference        | 2019        |
| Site        | Uniform            | 74.04        | 10.60       | Small Bird        | Reference        | 2019        |
| Site        | Half-normal        | 74.54        | 11.10       | Small Bird        | Reference        | 2019        |
| 1           | Uniform            | 76.17        | 12.73       | Small Bird        | Reference        | 2019        |
| 1           | Half-normal        | 86.52        | 23.09       | Small Bird        | Reference        | 2019        |
| <b>Site</b> | <b>Exponential</b> | <b>61.20</b> | <b>0.00</b> | <b>Large Bird</b> | <b>Reference</b> | <b>2019</b> |
| Site        | Half-normal        | 65.01        | 3.82        | Large Bird        | Reference        | 2019        |
| 1           | Exponential        | 68.15        | 6.95        | Large Bird        | Reference        | 2019        |
| 1           | Hazard             | 70.25        | 9.06        | Large Bird        | Reference        | 2019        |
| Site        | Uniform            | 70.58        | 9.39        | Large Bird        | Reference        | 2019        |
| Site        | Hazard             | 70.71        | 9.51        | Large Bird        | Reference        | 2019        |
| 1           | Uniform            | 74.18        | 12.98       | Large Bird        | Reference        | 2019        |
| 1           | Half-normal        | 76.69        | 15.50       | Large Bird        | Reference        | 2019        |
